# Supplementary material for: Amphiphilic Cationic Macromolecules Highly Effective Against Multi-Drug Resistant Gram-Positive Bacteria and Fungi With No Detectable Resistance
Source: PubMed Central journal article supplement (PMC7033416; doi:10.3389/fbioe.2020.00055), 2020-02-14
Supplement: Data_Sheet_1.pdf [file Data_Sheet_1.pdf]

## Supplementary Material

### Characterizations of *N*-methylated PEI (1)

FT-IR ( $\text{cm}^{-1}$ ): 2953 and 2833 (C-H str), 1458 (C-H bend),  $^1\text{H-NMR}$  (400 MHz,  $\text{CDCl}_3$ ):  $\delta/\text{ppm}$  2.25 (s, 3H,  $-\text{N}(\text{CH}_3)-$ ), 2.43-2.6 (m, 4H,  $-\text{N}(\text{CH}_2\text{CH}_2)-$ ).

### Characterizations of activated esters and amides intermediates (2a-2c and 3a-3c)

**Butyl 2-bromoethanoate (2a):** Yield, 97%;  $^1\text{H-NMR}$  (400 MHz,  $\text{CDCl}_3$ ):  $\delta/\text{ppm}$  0.89 (t, 3H terminal  $-\text{CH}_3$ ), 1.34 (m, 2H,  $-\text{CH}_2\text{CH}_2\text{CH}_3$ ), 1.56 (m, 2H,  $-\text{CH}_2\text{CH}_2\text{CH}_2\text{CH}_3$ ), 3.88 (s, 2H,  $-\text{COCH}_2\text{Br}$ ), 4.18 (t, 2H,  $-\text{COOCH}_2-$ ).

**Hexyl 2-bromoethanoate (2b):** Yield, 98%;  $^1\text{H-NMR}$  (400 MHz,  $\text{CDCl}_3$ ):  $\delta/\text{ppm}$  0.88 (t, 3H, terminal  $-\text{CH}_3$ ), 1.28 (m, 6H,  $-\text{CH}_2(\text{CH}_2)_3-$ ), 1.61 (m, 2H,  $-\text{CH}_2(\text{CH}_2)_3\text{CH}_3$ ), 3.89 (s,  $-\text{COCH}_2\text{Br}$ , 2H), 4.14 (t, 2H,  $-\text{COOCH}_2-$ ).

**Octyl 2-bromoethanoate (2c):** Yield, 95%;  $^1\text{H-NMR}$  (400 MHz,  $\text{CDCl}_3$ ):  $\delta/\text{ppm}$  0.89 (t, 3H, terminal  $-\text{CH}_3$ ), 1.28 (m, 10H  $-\text{CH}_2(\text{CH}_2)_5\text{CH}_3$ ), 1.62 (m, 2H,  $-\text{CH}_2(\text{CH}_2)_5\text{CH}_3$ ), 3.92 (s, 2H,  $-\text{COCH}_2\text{Br}$ ), 4.20 (t, 2H,  $-\text{COOCH}_2-$ ).

***N*-butyl-2-bromoethanamide (3a):** Yield, 100%;  $^1\text{H-NMR}$  (400 MHz,  $\text{CDCl}_3$ ):  $\delta/\text{ppm}$  0.88 (t, 3H, terminal  $-\text{CH}_3$ ), 1.35 (m, 2H,  $-\text{CH}_2\text{CH}_2\text{CH}_3$ ), 1.56 (m, 2H,  $-\text{CH}_2\text{CH}_2\text{CH}_2\text{CH}_3$ ), 3.29 (q, 2H,  $-\text{CONHCH}_2-$ ), 3.92 (s, 2H,  $-\text{COCH}_2\text{Br}$ ), 6.72 (br. s, 1H, amide  $-\text{NHCO}-$ ).

***N*-hexyl-2-bromoethanamide (3b):** Yield, 96%;  $^1\text{H-NMR}$  (400 MHz,  $\text{CDCl}_3$ ):  $\delta/\text{ppm}$  0.91 (t, terminal 3H,  $-\text{CH}_3$ ), 1.3 (m, 6H,  $-\text{CH}_2(\text{CH}_2)_3-$ ), 1.49 (m, 2H,  $-\text{CH}_2(\text{CH}_2)_3\text{CH}_3$ ), 3.31 (q, 2H,  $-\text{CONHCH}_2-$ ), 3.88 (s, 2H,  $-\text{COCH}_2\text{Br}$ ), 6.54 (br. s, 1H, amide  $-\text{NHCO}-$ ).

***N*-octyl-2-bromoethanamide (3c) :** Yield, 95.5%;  $^1\text{H-NMR}$  (400 MHz,  $\text{CDCl}_3$ ):  $\delta/\text{ppm}$  0.88 (t, terminal 3H,  $-\text{CH}_3$ ), 1.28 (m, 10H  $-\text{CH}_2(\text{CH}_2)_5\text{CH}_3$ ), 1.61 (m, 2H,  $-\text{CH}_2(\text{CH}_2)_5\text{CH}_3$ ), 3.29 (q, 2H,  $-\text{CONHCH}_2-$ ), 3.94 (s, 2H,  $-\text{COCH}_2\text{Br}$ ), 7.22 (br. s, 1H, amide  $-\text{NHCO}-$ ).

### Characterizations of the ACM- $\text{N}_{\text{alk}}$ (4-7)

**ACM-N<sub>But</sub> (4):** Yield, 83.4%; <sup>1</sup>H NMR (400 MHz, D<sub>2</sub>O): δ/ppm 0.96 (t, 3H, terminal -CH<sub>3</sub>), 1.38-1.51 (br, 2H, -CH<sub>2</sub>CH<sub>2</sub>CH<sub>3</sub>), 1.72-1.89 (br, 2H, -CH<sub>2</sub>CH<sub>2</sub>CH<sub>2</sub>N(CH<sub>3</sub>)CH<sub>2</sub>CH<sub>2</sub>-), 3.12-3.6 (br, 9H, -(CH<sub>2</sub>)<sub>2</sub>N(CH<sub>2</sub>)(CH<sub>3</sub>)-).

**ACM-N<sub>Hex</sub> (5):** Yield, 84%; <sup>1</sup>H NMR (400 MHz, D<sub>2</sub>O): δ/ppm 0.85 (t, 3H, terminal -CH<sub>3</sub>), 1.18-1.48 (br, 6H, -CH<sub>2</sub>(CH<sub>2</sub>)<sub>3</sub>-), 1.70-1.85 (br, 2H, -CH<sub>2</sub>CH<sub>2</sub>N(CH<sub>3</sub>)CH<sub>2</sub>CH<sub>2</sub>-), 3.41-4.09 (br, 9H, -(CH<sub>2</sub>)<sub>2</sub>N(CH<sub>2</sub>)(CH<sub>3</sub>)-).

**ACM-N<sub>Oct</sub> (6):** Yield, 82.5%; <sup>1</sup>H NMR (400 MHz, D<sub>2</sub>O): δ/ppm 0.88 (t, 3H, terminal -CH<sub>3</sub>), 1.16-1.50 (br, 10H, -CH<sub>2</sub>(CH<sub>2</sub>)<sub>5</sub>-), 1.59-1.89 (br, 2H, -CH<sub>2</sub>CH<sub>2</sub>N(CH<sub>3</sub>)CH<sub>2</sub>CH<sub>2</sub>-), 3.17-4.44 (br, 9H, -(CH<sub>2</sub>)<sub>2</sub>N(CH<sub>2</sub>)(CH<sub>3</sub>)-).

**ACM-N<sub>Dec</sub> (7):** Yield, 80.3%; <sup>1</sup>H NMR (400 MHz, CDCl<sub>3</sub>): δ/ppm 0.88 (t, 3H, terminal -CH<sub>3</sub>), 1.22-1.48 (br, 14H, -CH<sub>2</sub>(CH<sub>2</sub>)<sub>7</sub>-), 1.6-1.75 (br, 2H, -CH<sub>2</sub>CH<sub>2</sub>N(CH<sub>3</sub>)CH<sub>2</sub>CH<sub>2</sub>-), 3.3-4.04 (br, 9H, -(CH<sub>2</sub>)<sub>2</sub>N(CH<sub>2</sub>)(CH<sub>3</sub>)-).

#### Characterizations of the ACM-E<sub>alk</sub> (8-10) and ACM-A<sub>alk</sub> (11-13)

**ACM-E<sub>But</sub> (8):** Yield, 76.5%; <sup>1</sup>H NMR (400 MHz, D<sub>2</sub>O): δ/ppm 0.88 (t, 3H, terminal -CH<sub>3</sub>), 1.22-1.35 (br, 2H, -CH<sub>2</sub>CH<sub>2</sub>CH<sub>3</sub>), 1.65-1.75 (q, 2H, -CH<sub>2</sub>CH<sub>2</sub>CH<sub>2</sub>N(CH<sub>3</sub>)CH<sub>2</sub>CH<sub>2</sub>-), 3.52-3.85 (br, 7H, -(CH<sub>2</sub>)<sub>2</sub>N(CH<sub>2</sub>)(CH<sub>3</sub>)-), 3.9-4.4 (br, 2H, -CH<sub>2</sub>OCOCH<sub>2</sub>N(CH<sub>3</sub>)CH<sub>2</sub>CH<sub>2</sub>-), 4.5-4.75 (br, 2H, -OCOCH<sub>2</sub>N(CH<sub>3</sub>)CH<sub>2</sub>CH<sub>2</sub>-).

**ACM-E<sub>Hex</sub> (9):** Yield, 76%; <sup>1</sup>H-NMR (400 MHz, CDCl<sub>3</sub>): δ/ppm 0.89 (t, 3H, terminal -CH<sub>3</sub>), 1.24-1.39 (br m, 6H, -CH<sub>2</sub>(CH<sub>2</sub>)<sub>3</sub>-), 1.7-1.85 (q, 2H, -CH<sub>2</sub>CH<sub>2</sub>N(CH<sub>3</sub>)CH<sub>2</sub>CH<sub>2</sub>-), 3.79-4.29 (m, 7H, -(CH<sub>2</sub>)<sub>2</sub>N(CH<sub>2</sub>)(CH<sub>3</sub>)-), 4.35-4.6 (m, 2H, -CH<sub>2</sub>OCOCH<sub>2</sub>N(CH<sub>3</sub>)CH<sub>2</sub>CH<sub>2</sub>-), 4.55-4.74 (m, 2H, -OCOCH<sub>2</sub>N(CH<sub>3</sub>)CH<sub>2</sub>CH<sub>2</sub>-).

**ACM-E<sub>Oct</sub> (10):** Yield, 75.4%; <sup>1</sup>H NMR (400 MHz, CDCl<sub>3</sub>): δ/ppm 0.87 (t, 3H, terminal -CH<sub>3</sub>), 1.28-1.38 (br, 10H, -CH<sub>2</sub>(CH<sub>2</sub>)<sub>5</sub>-), 1.75-1.87 (q, 2H, -CH<sub>2</sub>CH<sub>2</sub>N(CH<sub>3</sub>)CH<sub>2</sub>CH<sub>2</sub>-), 3.6-3.8 (br, 7H, -(CH<sub>2</sub>)<sub>2</sub>N(CH<sub>2</sub>)(CH<sub>3</sub>)-), 4.1-4.45 (br, 2H, -CH<sub>2</sub>OCOCH<sub>2</sub>N(CH<sub>3</sub>)CH<sub>2</sub>CH<sub>2</sub>-), 4.55-4.89 (br, 2H, -OCOCH<sub>2</sub>N(CH<sub>3</sub>)CH<sub>2</sub>CH<sub>2</sub>-).

**ACM-A<sub>But</sub> (11):** Yield, 76.5%; <sup>1</sup>H NMR (400 MHz, D<sub>2</sub>O): δ/ppm 0.85 (t, 3H, terminal -CH<sub>3</sub>), 1.28-1.48 (br, 2H, -CH<sub>2</sub>CH<sub>2</sub>CH<sub>3</sub>), 1.82 (q, 2H, -CH<sub>2</sub>CH<sub>2</sub>CH<sub>2</sub>N(CH<sub>3</sub>)CH<sub>2</sub>CH<sub>2</sub>-), 3.1-3.8 (br, 7H, -

$(CH_2)_2N(CH_2)(CH_3)-$ , 3.9-4.4 (br, 2H,  $-CH_2NHCOCH_2N(CH_3)CH_2CH_2-$ ), 4.5-4.9 (br, 2H,  $-NHCOCH_2N(CH_3)CH_2CH_2-$ ), 8.0-8.5 (br, 1H,  $-CONHCH_2-$ ).

**ACM-A<sub>Hex</sub> (12)**: Yield, 79%;  $^1H$  NMR (400 MHz,  $CDCl_3$ ):  $\delta$ /ppm 0.88 (t, 3H, terminal  $-CH_3$ ), 1.2-1.39 (br, 6H,  $-CH_2(CH_2)_3-$ ), 1.72- 1.9 (q, 2H,  $-CH_2CH_2CH_2N(CH_3)CH_2CH_2-$ ), 3.2-3.89 (br, 7H,  $(CH_2)_2N(CH_2)(CH_3)-$ ), 4.05-4.3 (br, 2H,  $-CH_2NHCOCH_2N(CH_3)CH_2CH_2-$ ), 4.5-4.86 (br, 2H,  $-NHCOCH_2N(CH_3)CH_2CH_2-$ ), 8.05-8.5 (br, 1H,  $-CONHCH_2-$ ).

**ACM-A<sub>Oct</sub> (13)**: Yield, 75.2%;  $^1H$  NMR (400 MHz,  $CDCl_3$ ):  $\delta$ /ppm 0.89 (t, 3H, terminal  $-CH_3$ ), 1.2-1.49 (br m, 10H,  $-CH_2(CH_2)_5$ ), 1.7-1.87 (q, 2H,  $-CH_2CH_2CH_2N(CH_3)CH_2CH_2-$ ), 3.1-3.67 (br, 7H,  $(CH_2)_2N(CH_2)(CH_3)-$ ), 3.93-4.3 (br, 2H,  $-CH_2NHCOCH_2N(CH_3)CH_2CH_2-$ ), 4.6-4.8 (br, 2H,  $-NHCOCH_2N(CH_3)CH_2CH_2-$ ), 8-8.5 (br, 1H,  $-CONHCH_2-$ ).

**Table S1.** Molecular weight of the amphiphilic cationic macromolecules (ACMs).

| <b>Macromolecules</b>           | <b><sup>a</sup>Degree of quaternization<br/>(DQ) (%)</b> | <b><sup>b</sup>Molecular Weight (M<sub>n</sub>)<br/>(kDa)</b> |
|---------------------------------|----------------------------------------------------------|---------------------------------------------------------------|
| <b>ACM-N<sub>but</sub> (4)</b>  | <b>100</b>                                               | <b>3.6</b>                                                    |
| <b>ACM-N<sub>Hex</sub> (5)</b>  | <b>100</b>                                               | <b>4.2</b>                                                    |
| <b>ACM-N<sub>Oct</sub> (6)</b>  | <b>100</b>                                               | <b>4.7</b>                                                    |
| <b>ACM-N<sub>Dec</sub> (7)</b>  | <b>100</b>                                               | <b>5.2</b>                                                    |
| <b>ACM-E<sub>But</sub> (8)</b>  | <b>100</b>                                               | <b>4.7</b>                                                    |
| <b>ACM-E<sub>Hex</sub> (9)</b>  | <b>100</b>                                               | <b>5.2</b>                                                    |
| <b>ACM-E<sub>Oct</sub> (10)</b> | <b>100</b>                                               | <b>5.7</b>                                                    |
| <b>ACM-A<sub>But</sub> (11)</b> | <b>100</b>                                               | <b>4.7</b>                                                    |
| <b>ACM-A<sub>Hex</sub> (12)</b> | <b>100</b>                                               | <b>5.2</b>                                                    |
| <b>ACM-A<sub>Oct</sub> (13)</b> | <b>100</b>                                               | <b>5.7</b>                                                    |

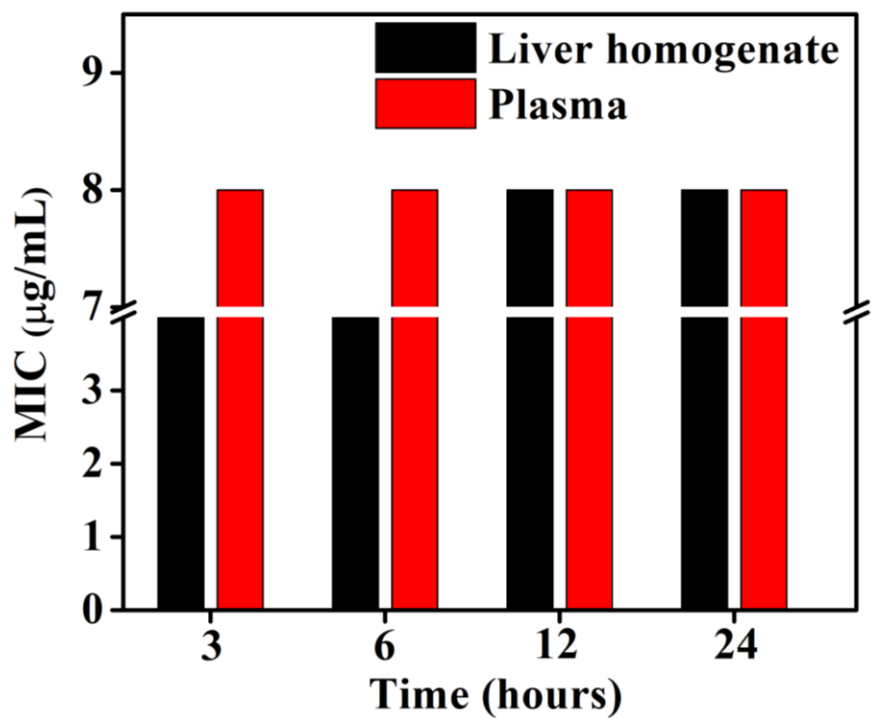

**Figure S1.** Antibacterial activity of ACM-A<sub>Hex</sub> (**12**) in physiological fluids. Each concentration had triplicate values and the entire experiment was performed twice. The average data was reported.
